# Supplementary material
Source: PubMed Central journal article supplement (PMC4944649)
Supplement: NIHMS801085-supplement-Supporting_information.pdf [file NIHMS801085-supplement-Supporting_information.pdf]

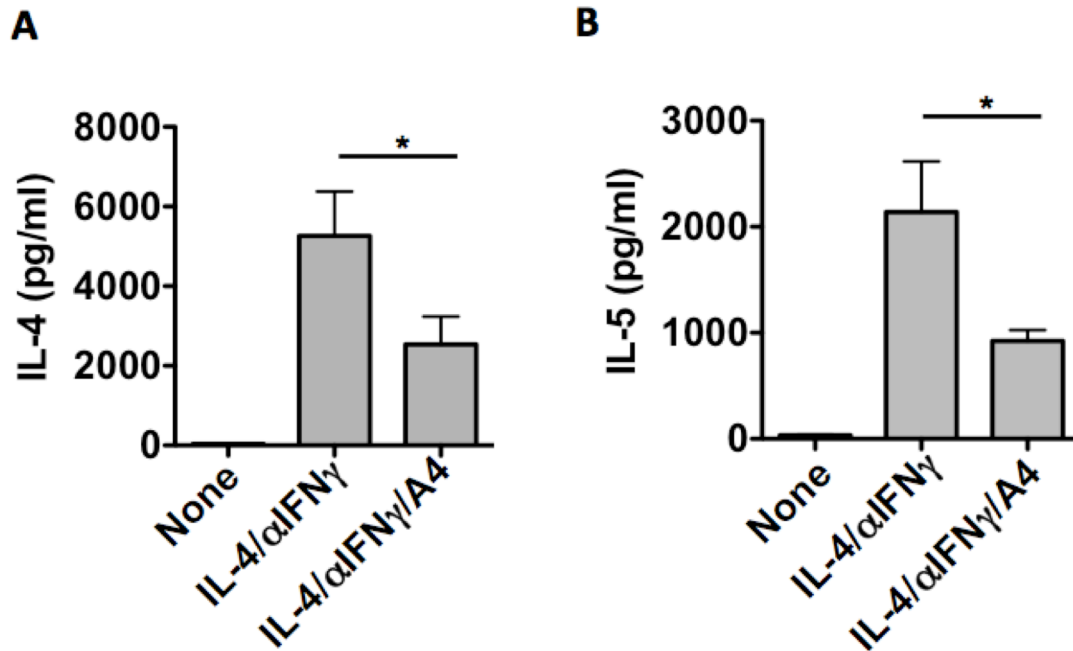

**Supporting information Figure 1.** B6 CD4<sup>+</sup> T cells were cultured with medium alone,  $\alpha$ -CD3 (5  $\mu$ g/ml) and splenic APCs in the presence or absence of A4 lysates (25  $\mu$ g/ml) under Th2 polarizing conditions (30 ng/ml of IL-4 and 10  $\mu$ g/ml of anti-IFN $\gamma$  mAb) for 24 h. IL-4 and IL-5 were measured from the supernatant by ELISA. Representative of 3 independent experiments. Data are shown in mean  $\pm$  SEM. \* $p$ <0.05

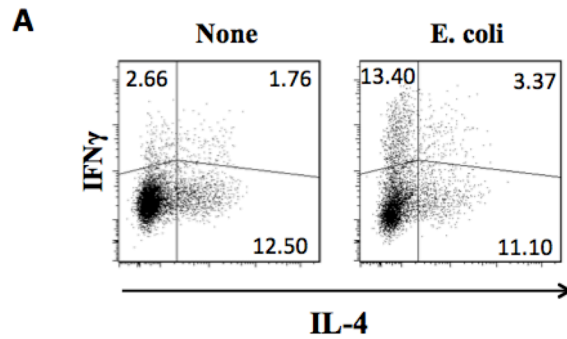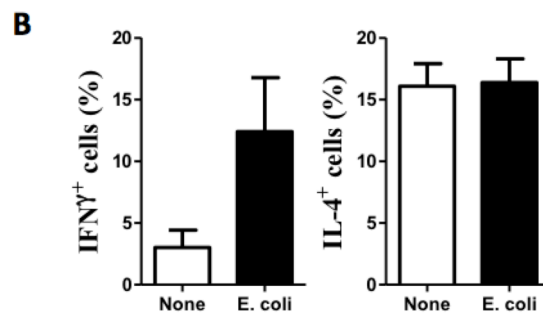

**Supporting information Figure 2.** B6 CD4<sup>+</sup> cells were cultured with  $\alpha$ -CD3 (5  $\mu$ g/ml) and splenic APCs in the presence or absence of *E. coli* lysates (50  $\mu$ g/ml) for 5 days. CD4 T cell expression of IL-4 and IFN $\gamma$  was measured by flow cytometry. **A.** FACS plots are representative of 3 independent experiments. **B.** Relative frequencies of IL-4<sup>+</sup> and IFN $\gamma$ <sup>+</sup> CD4<sup>+</sup> T cells of the samples in A. Data in B are shown in mean  $\pm$  SEM.

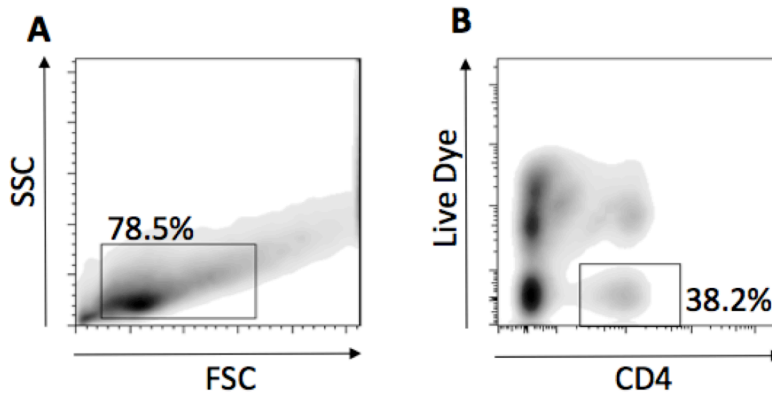

**Supporting information Figure 3.** General gating of FACS data, **A.** total cells, **B.** CD4 Live cells.
